# Supplementary material
Source: Springer Nature journal article supplement (https://www.springermedizin.de/resource/supplementary/12943_2012_1050_MOESM4_ESM.pdf/9552148)

**(A)**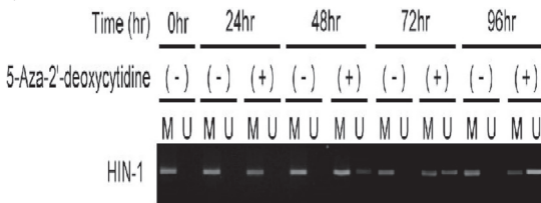**(B)**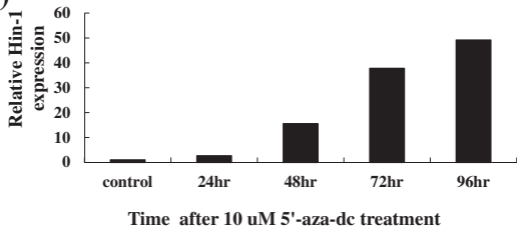**(C)**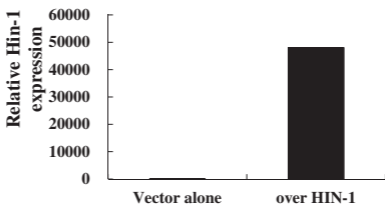**(D)**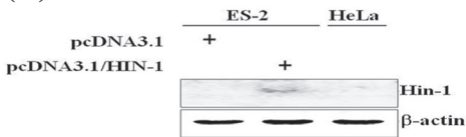

Supplement: MOESM4 [file 9552148]
